# Supplementary material for: Balancing Standardisation and Flexibility in National Complex Intervention Scale-Up: A Qualitative Study of Leadership Experiences and Management in the Implementation of Proactive Health Support in Denmark
Source: Research Square preprint supplement (doi:10.21203/rs.3.rs-7977843/v1), 2025-12-01
Supplement: Supplementary file 1 [file f18d7e574f692b621352f982.docx]

**Supplementary File – Interview Guide (Project Leaders)**

**Interview Guide – Project Leaders**

Briefing

The interview begins with the interviewer welcoming the participant and introducing themselves, and a second person present to take notes during the interview. The purpose of the research project is then explained, followed by the purpose of the interview.

**Welcome and presentation of the interviewer**

Why organisational research

The impact of Proactive Health Support is expected to depend heavily on how the intervention is organised and implemented. It is essential to emphasise that the purpose of this interview is that the participant possesses knowledge about Proactive Health Support that cannot be obtained elsewhere. The results of the interview are therefore unique and important.

The purpose of this interview is therefore to gain insights from your practical experiences in implementing and working with Proactive Health Support. We will touch on themes such as:

– The national framework for the program

– Your experiences with the regional implementation

– Your role and primary responsibilities

The interview will take approximately 50 minutes. Your daily work and experience are the focus. There are no right or wrong answers.

Use of the interview material

Recording: We would like to record the interview.

The results will be included (together with other interviews) in the evaluation of the project. The results may also be used in a research article for an international journal.

Anonymity: The interview will be anonymised, and only the organisational researchers will have access to the original material. This means that:

1) We will use general role titles as a default

2) In international publications, regions will be given fictional names and regions and roles described in general terms.

Validation of the interview: If you are interested, you can read through the transcript once it has been transcribed.

**Interview Themes**

1. Presentation round

– Can you briefly introduce yourself?

– How long have you been involved with Proactive Health Support?

2. The national framework for the project and experiences with regional implementation

– What does it mean to you that this is a national project?

– What has it enabled, and what has been challenging?

– How has the collaboration with the national program management worked?

– Have you encountered any tensions in the collaboration between the national and regional levels? What are your thoughts on that?

– Have you felt that you had the autonomy to shape the local implementation?

3. Your role and tasks as regional project leader

– What are your primary responsibilities as a project leader in Proactive Health Support?

– What is your daily role in managing the Proactive Health Support team?

– Who do you work with most closely, and how does that collaboration function?

– What kind of support or guidance do you receive from the national level?

– What kind of leadership do you try to practice in the project?

4. Cross-sector collaboration

– How have you worked with other sectors (e.g., hospitals, municipalities, general practice)?

– What are your experiences with this collaboration?

– What has worked well, and what has been difficult?

5. Performance Management

– How has the performance management model been used in your region?

– What has been helpful?

– What have the challenges been?

6. Debriefing

– Is there anything you would like to add?

– Is there anything you expected us to ask about that we didn’t?

– How did you experience the interview?
